# Supplementary material for: Exploring leukocyte differential count ratio profiles as inflammatory biomarkers in diabetic retinopathy: a systematic review and meta-analysis
Source: Springer Nature journal article supplement (doi:10.1186/s12886-025-04075-y), 2025-05-01
Supplement: MOESM1 [file 12886_2025_4075_MOESM1_ESM.pdf]

## Supplementary File 1. Search Strategy

| Key Concepts                                | Concept 1                                                                                                            | Concept 2                                                                                                                                                                                                                             |
|---------------------------------------------|----------------------------------------------------------------------------------------------------------------------|---------------------------------------------------------------------------------------------------------------------------------------------------------------------------------------------------------------------------------------|
|                                             | Diabetic retinopathy                                                                                                 | Peripheral blood marker                                                                                                                                                                                                               |
| Controlled vocabulary terms / Subject terms | "Diabetic Retinopathy" [MeSH Term] OR "Diabetic Complications" [MeSH Term]                                           | "Complete Blood Count" [MeSH Term] OR "Blood Cells" [MeSH Term] OR "Neutrophils" [MeSH Term] OR "Monocytes" [MeSH Term] OR "Platelets" [MeSH Term] OR "Lymphocytes" [MeSH Term]                                                       |
| Free text terms / natural language terms    | "Diabetic Retinopathy" [Text Word] OR "Diabetic Complications" [Text Word] OR "Diabetic Microvascular complications" | "Peripheral Blood Marker" [Text Word] OR "Neutrophil to Lymphocyte Ratio" [Text Word] OR "Monocyte to Lymphocyte Ratio" [Text Word] OR "Platelet to Lymphocyte Ratio" [Text Word] OR "Systemic Immune Inflammation Index" [Text Word] |

### Draft Entry PubMed Search

| No | Entry                                                                                                                                                                                                                                                                                                                                                                                                                    | Filter    | Total Findings |
|----|--------------------------------------------------------------------------------------------------------------------------------------------------------------------------------------------------------------------------------------------------------------------------------------------------------------------------------------------------------------------------------------------------------------------------|-----------|----------------|
| 1. | "Diabetic Retinopathy" [MeSH Term] OR "Diabetic Complications" [MeSH Term] OR "Diabetic Retinopathy" [Text Word] OR "Diabetic Complications" [Text Word] OR "Diabetic Microvascular complications"                                                                                                                                                                                                                       | None      | 53,157         |
| 2. | "Complete Blood Count" [MeSH Term] OR "Blood Cells" [MeSH Term] OR "Neutrophils" [MeSH Term] OR "Monocytes" [MeSH Term] OR "Platelets" [MeSH Term] OR "Lymphocytes" [MeSH Term] OR "Peripheral Blood Marker" [Text Word] OR "Neutrophil to Lymphocyte Ratio" [Text Word] OR "Monocyte to Lymphocyte Ratio" [Text Word] OR "Platelet to Lymphocyte Ratio" [Text Word] OR "Systemic Immune Inflammation Index" [Text Word] | None      | 1,017,380      |
| 3. | S1 AND S2                                                                                                                                                                                                                                                                                                                                                                                                                | None      | 904            |
| 4. | S1 AND S2                                                                                                                                                                                                                                                                                                                                                                                                                | Full Text | 723            |

### Draft Entry EBSCO Search

| No | Entry                                                                                                                                                                | Filter | Total Findings |
|----|----------------------------------------------------------------------------------------------------------------------------------------------------------------------|--------|----------------|
| 1. | SU ("Diabetic Retinopathy") OR SU ("Diabetic Complications" OR TX "Diabetic Retinopathy" OR TX "Diabetic Complications" OR TX "Diabetic Microvascular complications" | None   | 129,522        |

|    |                                                                                                                                                                                                                                                                                                                                   |           |         |
|----|-----------------------------------------------------------------------------------------------------------------------------------------------------------------------------------------------------------------------------------------------------------------------------------------------------------------------------------|-----------|---------|
| 2. | SU ("Complete Blood Count") OR SU ("Blood Cells") OR SU ("Neutrophils") OR SU ("Monocytes") OR SU ("Platelets") OR SU ("Lymphocytes") OR TX "Peripheral Blood Marker" OR TX "Neutrophil to Lymphocyte Ratio" OR TX "Monocyte to Lymphocyte Ratio" OR TX "Platelet to Lymphocyte Ratio" OR TX "Systemic Immune Inflammation Index" | None      | 750,553 |
| 3. | S1 AND S2                                                                                                                                                                                                                                                                                                                         | None      | 1,888   |
| 4. | S1 AND S2                                                                                                                                                                                                                                                                                                                         | Full Text | 1,481   |

#### **Draft Entry ProQuest Search**

| <b>No</b> | <b>Entry</b>                                                                                                                                                                                                                                                                                                                                                                                                                                  | <b>Filter</b> | <b>Total Findings</b> |
|-----------|-----------------------------------------------------------------------------------------------------------------------------------------------------------------------------------------------------------------------------------------------------------------------------------------------------------------------------------------------------------------------------------------------------------------------------------------------|---------------|-----------------------|
| 1.        | MAINSUBJECT.EXACT (Diabetic Retinopathy) OR MAINSUBJECT.EXACT (Diabetic Complications) OR fulltext (Diabetic Retinopathy) OR fulltext (Diabetic Complications) OR fulltext (Diabetic Microvascular complications)                                                                                                                                                                                                                             | None          | 47,696                |
| 2.        | MAINSUBJECT.EXACT (Complete Blood Count) OR MAINSUBJECT.EXACT (Blood Cells) OR MAINSUBJECT.EXACT (Neutrophils) OR MAINSUBJECT.EXACT (Monocytes) OR MAINSUBJECT.EXACT (Platelets) OR MAINSUBJECT.EXACT (Lymphocytes) OR fulltext (Peripheral Blood Marker) OR fulltext (Neutrophil to Lymphocyte Ratio) OR fulltext (Monocyte to Lymphocyte Ratio) OR fulltext (Platelet to Lymphocyte Ratio) OR fulltext (Systemic Immune Inflammation Index) | None          | 1,690                 |
| 3.        | S1 AND S2                                                                                                                                                                                                                                                                                                                                                                                                                                     | None          | 185                   |
